# Supplementary material
Source: publisher figshare collection journal article supplement (https://gsajournals.figshare.com/ndownloader/files/12725144)
Supplement: Supplementary file 1 [file 12725144]

## Sheet: Table S3-IlluminaData
Table S3: summary of Illumina NextSeq data used for polishing.
Species	Stowers Order	Barcode	Number of reads	Coverage (x)
D. ananassae	MOLNG-2183	CGATGT	47188502	36.0034
D. biarmipes	MOLNG-2183	TGACCA	90132342	69.1199
D. bipectinata	MOLNG-2183	ACAGTG	79440736	58.241
D. erecta	MOLNG-2183	GCCAAT	92768772	87.5728
D. eugracilis	MOLNG-2183	CAGATC	95866200	62.8219
D. mauritiana	MOLNG-2182	GTAGAG	57144400	54.2854
D. mojavensis	MOLNG-2183	TTAGGC	82467984	74.3848
D. persimilis	MOLNG-2183	ACTTGA	88216450	67.1358
D. pseudoobscura	MOLNG-2183	GATCAG	81339550	72.7545
D. sechellia	MOLNG-2183	TAGCTT	95637926	86.0569
D. simulans	MOLNG-2182	GTCCGC	61054434	57.382
D. triauraria	MOLNG-2183	CTTGTA	90107458	64.3012
D. virilis	MOLNG-2183	GGCTAC	73918904	34.0745
D. willistoni	MOLNG-2183	AGTCAA	77232534	56.4016
D. yakuba	MOLNG-2183	AGTTCC	84656084	74.3902
